# Supplementary material for: Effects of vegetation cover and slope on soil erosion in the Eastern Chinese Loess Plateau under different rainfall regimes
Source: PeerJ. 2021 Apr 12;9:e11226. doi: 10.7717/peerj.11226 (PMC8048402; doi:10.7717/peerj.11226)
Supplement: Data S1 [file peerj-09-11226-s001.xlsx]

## Sheet: Sheet1
Runoff							Sediment yield
Type	ARC	SHC	NVC	APC	ABC		Type	ARC	SHC	NVC	ABC	APC
Ⅰ	5.23	6.17	7.23	10.23	10.99		Ⅰ	32.07	39.07	45.07	50.07	58.07
Ⅱ	3	11	20	24	23		Ⅱ	54.34	75.22	95.37	108.7	123.63
Ⅲ	0	0.7	3.2	4.1	4.5		Ⅲ	0	17.491	38.694	61.81	79.009
Ⅳ	0.75	0.75	2.875	5.875	7.375		Ⅳ	6.5175	11.34	32.015	69.9638	69.355
Ⅴ	1.84	3.776	10.146	13.624	13.382		Ⅴ	1.422	9.22	25.532	22.53	38.24
